1 **Title:**

2 Inferring the heritability of large-scale functional networks with a multivariate ACE  
3 modeling approach

4 **Authors:**

5 Fernanda L. Ribeiro<sup>1,2\*</sup>, Felipe R. C. dos Santos<sup>3,4\*</sup>, João R. Sato<sup>1</sup>, Walter H. L. Pinaya<sup>1,5†</sup>,  
6 Claudinei E. Biazoli Jr.<sup>1†</sup>

7 1 – Center of Mathematics, Computing and Cognition, Universidade Federal do ABC;  
8 São Bernardo do Campo 09606-045; Brazil

9 2 – School of Psychology, The University of Queensland; Brisbane QLD 4072; Australia

10 3 – Centro de Oncologia Molecular, Hospital Sírio-Libanês; São Paulo 01308-060; Brazil

11 4 – Programa Interunidades em Bioinformática, Universidade de São Paulo; São Paulo  
12 05508-220; Brazil

13 5 – Department of Biomedical Engineering; School of Biomedical Engineering &  
14 Imaging Sciences; King’s College London; London WC2R 2LS; United Kingdom

15 \*These authors contributed equally to this work.

16 †These authors contributed equally to this work.

17 **Corresponding author:**

18 Fernanda L. Ribeiro

19 E-mail address: [fernanda.ribeiro@uq.edu.au](mailto:fernanda.ribeiro@uq.edu.au)

20 Postal address: School of Psychology, The University of Queensland; Brisbane QLD  
21 4072; Australia

## 22 **Abstract**

23 Recent evidence suggests that the human functional connectome is stable at different time  
24 scales and unique. These characteristics posit the functional connectome not only as an  
25 individual marker but also as a powerful discriminatory measure characterized by high  
26 intersubject variability. Among distinct sources of intersubject variability, the long-term  
27 sources include functional patterns that emerge from genetic factors. Here, we sought to  
28 investigate the contribution of additive genetic factors to the variability of functional  
29 networks by determining the heritability of the connectivity strength in a multivariate  
30 fashion. First, we reproduced and extended the connectome fingerprinting analysis to the  
31 identification of twin pairs. Then, we estimated the heritability of functional networks by  
32 a multivariate ACE modeling approach with bootstrapping. Twin pairs were identified  
33 above chance level using connectome fingerprinting, with monozygotic twin  
34 identification accuracy equal to 57.2% on average for whole-brain connectome.  
35 Additionally, we found that a visual (0.37), the medial frontal (0.31) and the motor (0.30)  
36 functional networks were the most influenced by additive genetic factors. Our findings  
37 suggest that genetic factors not only partially determine intersubject variability of the  
38 functional connectome, such that twins can be identified using connectome  
39 fingerprinting, but also differentially influence connectivity strength in large-scale  
40 functional networks.

41 **Keywords:** Connectome fingerprinting; Multivariate modeling; Twin study; Functional  
42 connectome

## 43 **Introduction**

44 In the past few years, fMRI research has been living a paradigm shift, moving from  
45 population inferences to the study of individual differences (Dubois & Adolphs, 2016;  
46 Seghier & Price, 2018). Previous studies have paved the way for the study of individual  
47 variability in functional connectivity patterns of the human brain (Finn et al., 2015;  
48 Miranda-Dominguez et al., 2014; Mueller et al., 2013). In this context, resting-state fMRI  
49 (rs-fMRI) showed to be particularly powerful in determining underlying differences in  
50 the wiring patterns of functional connectome (FC) profiles. Indeed, connectome-based  
51 individual predictions achieved identification accuracies as high as 99% when comparing  
52 functional connectivity matrices (Finn et al., 2015). Hence, the endeavor to identify and  
53 to characterize the individual functional connectivity architecture has been shown to have  
54 an imperative place in the study of individual differences.

55 Recent and mounting evidence suggests that FC profiles are stable at different time scales  
56 (Gratton et al., 2018; Jalbrzikowski et al., 2020; Miranda-Dominguez et al., 2018; Sato,  
57 White, & Biazoli, 2017). This characteristic posits the FC not only as an individual marker  
58 due to the comparably low intrasubject variability but also as a powerful discriminatory  
59 measure characterized by the high intersubject variability. Gratton et al. (2018) showed  
60 that despite functional networks displaying common organizational features at the group-  
61 level, the similarity between functional networks substantially increased at the individual  
62 level when evaluating the same participant in different tasks and sessions. This evidence  
63 supports the fact that individual stable patterns are crucial for explaining the intersubject  
64 variability of functional networks. Therefore, these findings suggest that sources of  
65 intersubject variability are stable over time, acting as individual signatures or  
66 ‘fingerprints’.

67 Seghier and Price (2018) refer to the presence of distinct sources of intersubject variability  
68 that differ in their timescale. In the lower bound, there are sources of variability due to  
69 mood states and context. The medium to long-term sources of intersubject variability  
70 include functional patterns built from the intimate interaction of an individual with the  
71 environment and genetic factors (Seghier & Price, 2018), respectively. Interestingly,  
72 functional networks show distinct levels of intersubject variability. Networks comprising  
73 higher-order associative cortical areas seem to remarkably contribute to the FC  
74 distinctiveness (Finn et al., 2015; Jalbrzikowski et al., 2020; Kaufmann et al., 2017;  
75 Miranda-Dominguez et al., 2018, 2014; Mueller et al., 2013), which, in turn, might be  
76 due to a high intersubject (Gratton et al., 2018; Mueller et al., 2013) and low intrasubject  
77 variability (Laumann et al., 2015; Poldrack et al., 2015). On the other hand, functional  
78 connectivity within networks that comprises primary sensory and motor regions showed  
79 high intrasubject and low intersubject variability (Gratton et al., 2018; Laumann et al.,  
80 2015; Mueller et al., 2013; Poldrack et al., 2015). The importance of genetic factors to  
81 these different levels of intersubject variability, however, is yet to be further investigated.

82 Recent reports suggest that genetic factors crucially influence the intersubject variability  
83 in the functional connectome (Colclough et al., 2017; Demeter et al., 2020; Elliott et al.,  
84 2019; Ge, Holmes, Buckner, Smoller, & Sabuncu, 2017; Miranda-Dominguez et al.,  
85 2018; Yang et al., 2016). Connectome-based identification analyses were extended to the  
86 identification of twin pairs suggesting that part of the intersubject variability is due to  
87 genetic factors (Demeter et al., 2020; Miranda-Dominguez et al., 2018). Accordingly,  
88 studies indicate that the average heritability of the connectivity strength of the whole-  
89 brain connectome is between 15% to 25% within the Human Connectome Project dataset  
90 (Adhikari et al., 2018; Colclough et al., 2017; Elliott et al., 2019). On the other hand, the

91 heritability of the connectivity strength within some functional networks seems to be  
92 much higher (Ge et al., 2017; Teeuw et al., 2019) than in the whole-brain connectome.

93 However, substantial differences in brain parcellation schemas (Arslan et al., 2018;  
94 Eickhoff, Yeo, & Genon, 2018; Salehi et al., 2020) undermines the effort to determine  
95 the relationship between heritability and the different levels of intersubject variability.

96 Here, we (1) reproduced and extended the identification analysis introduced by Finn et  
97 al. (2015) to determine the functional networks that best uncovered individual uniqueness  
98 and intersubject similarity among matched twin pairs, and (2) we investigated how the  
99 different levels of intersubject variability of functional networks relate to their heritability  
100 by using a multivariate ACE modeling approach with bootstrapping. In our approach, 10  
101 functional connections (edges) were randomly drawn from the pool of connections and  
102 were used as variables in a multivariate ACE model. This model decomposes the variance  
103 of each variable (i.e., each edge) and the covariance between variables into additive  
104 genetic influences (A, or narrow-sense heritability (Mayhew & Meyre, 2017)), shared  
105 environment (C) and external sources of variability (E). Here, we only focused on the  
106 partitioning of variance to estimate network heritability, doing so by averaging the  
107 decomposition of variances into A, C and E components across variables (i.e., across  
108 edges) for each model fit. This process was repeated for many iterations which results in  
109 the distributions of means for each component (A, C and E). Additionally, this approach  
110 allows one to easily generate null distributions for statistical testing by randomly shuffling  
111 monozygotic and dizygotic twin statuses at each iteration (Colclough et al., 2017).

## 112 **Results**

### 113 *Functional connectivity-based identification analyses*

114 **Individual identification.** Whole-brain functional connectivity matrices were  
115 determined by using two distinct parcellation schemas: "Shen" (Shen, Tokoglu,  
116 Papademetris, & Constable, 2013) (268 nodes, 71,824 edges) and "Gordon" (Gordon et  
117 al., 2014) (333 nodes, 110,889 edges). For brevity, we only report the results using "Shen"  
118 parcels with appropriate reference to equivalent results using "Gordon" parcels in the  
119 supplementary material. Connectivity-based identifications were performed comparing  
120 pairs of resting-state functional connectivity matrices<sup>4</sup>. Resting-state data were acquired  
121 in two different days for every participant included in this study, resulting in two distinct  
122 functional connectivity matrices per participant. These pairs of connectivity matrices  
123 were separated into a 'target' and a 'database' set. Individual identification was  
124 determined by computing the Pearson's correlation score of a target connectivity matrix  
125 from the 'target' set (n=380) with all connectivity matrices from the 'database' set  
126 (n=380). Following that, the maximum correlation score among all comparisons between  
127 the target matrix and each of the FC matrices from the 'database' set should correspond  
128 to the correlation of the functional connectivity matrices of the same participant in  
129 different sessions. This process was repeated for all functional connectivity matrices  
130 within the 'target' set (Figure 1A). The accuracy of the method was defined by the  
131 proportion of correct predicted participants.

132 Individual identification analyses were determined with whole-brain functional  
133 connectome and individual functional networks (Supplementary Table 1). The resulting  
134 accuracy of whole-brain connectome based individual predictions was 97.8% (SD =  
135 0.4%), in agreement with previous studies (Finn et al., 2015; Waller et al., 2017). We also

136 investigated the relevance of individual functional networks for individual predictions by  
 137 sectioning the whole-brain functional connectome into sub-matrices of single networks.  
 138 From the 8 functional networks previously defined (Finn et al., 2015), the most successful  
 139 networks were the medial frontal ( $93.9 \pm 0.5\%$ ) and frontoparietal ( $91.8 \pm 0.3\%$ ) networks  
 140 (Figure 1B and Supplementary Table 1). Note that the visual networks and the default  
 141 mode network were the ones with the worst individual identification accuracy.

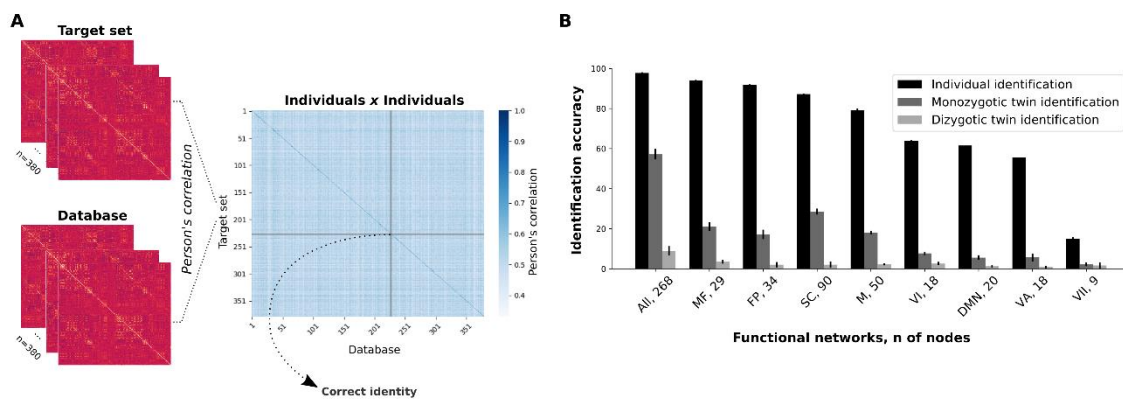

142  
 143 **Figure 1 - Connectome-based identifications.** A) Functional connectivity matrices from  
 144 different sessions were grouped into two datasets, which could be either the ‘target’ set or the  
 145 ‘database’. Following that, we computed the Pearson’s correlation of each individual connectivity  
 146 matrix from a ‘target’ set with each connectivity matrix from the ‘database’. Therefore, each row  
 147 within the individuals vs. individuals matrix contains the correlation scores between a target’s FC  
 148 and all functional connectivity matrices of the database. B) Mean identification accuracies for  
 149 individual and twin identification analyses for all functional networks (whole-brain included).  
 150 Mean identification for individual prediction was determined from two combinations of  
 151 ‘database’ and ‘target’ sets ( $RESTX \times RESTY$ , where  $X$  and  $Y \in \{1, 2\}$  and  $X \neq Y$ ), while the  
 152 mean twin identification was determined from four combinations ( $RESTX \times RESTY$ , where  $X$   
 153 and  $Y \in \{1, 2\}$ ). Error bars represent the standard deviation. All, whole-brain; MF, medial frontal;  
 154 FP, frontoparietal; SC, subcortical-cerebellum; M, motor; VI, visual I; DMN, default mode  
 155 network; VA, visual association; VII, visual II. We also present the number of nodes in each  
 156 network.

157 **Twin identification.** Previous studies indicate that functional connectivity among higher-  
158 order associative brain regions greatly varies across individuals (Gratton et al., 2018;  
159 Mueller et al., 2013), even though they are comparably more stable within an individual  
160 across sessions (Laumann et al., 2015; Poldrack et al., 2015). Thus, we hypothesized that  
161 genetic factors governed sources of high intersubject and low intrasubject variability in  
162 the functional connectome. In order to test this hypothesis, we sought to determine  
163 whether the FC profiles from pairs of twins were more similar compared to the ones from  
164 pairs of unrelated individuals by using connectome-based predictions.

165 First, we evaluated monozygotic twin identification by computing the correlation  
166 coefficients of the functional connectivity matrices of monozygotic individuals (n=246)  
167 within the ‘target’ set with all matrices in the database (246x380=93,480 comparisons).  
168 Our prediction was based on the selection of the highest correlation score (excluding the  
169 correlation scores between functional connectivity matrices of the same individual) for  
170 each ‘target’ participant vs. ‘database’ iteration. The mean whole-brain based prediction  
171 accuracy was 57.2% (SD = 2.6%). This result indicates that the idiosyncratic FC profiles  
172 might be genetically determined and they are sufficiently stable so one could identify  
173 monozygotic twins well above chance. Indeed, we have performed a permutation test, by  
174 exchanging twin pairs’ identities 1,000 times, such that for each identification iteration,  
175 a new twin pair identity was assigned. The maximum identification accuracy found  
176 through these 1,000 permutations was 1.6%, indicating that the whole-brain based  
177 identification performance is significantly different from the chance level (p-value <  
178 0.001).

179 Later on, we investigated the ability of specific functional networks in discriminating a  
180 twin pair from pairs of unrelated individuals (Figure 1B). At this stage, the most  
181 successful functional networks were the subcortical-cerebellum ( $28.6 \pm 1.5\%$ ) and medial



182 frontal ( $21.1 \pm 2.2\%$ ) networks. Noteworthy, the most successful functional networks on  
183 twin identification were amongst the ones that best performed on individual  
184 identifications. Nonetheless, a substantial decrease in the successful twin identification  
185 rates was observed for functional networks when compared to the whole-brain  
186 connectome, and these results were particularly affected by the number of nodes within  
187 each network. The least successful functional networks on twin identification were the  
188 ones with the least number of nodes, while the networks with a larger number of nodes  
189 tended to present higher accuracies. The Pearson's correlation score between the number  
190 of nodes of each network and its ability to correctly identify monozygotic twins was  $r =$   
191  $0.95$  ( $p\text{-value} = 6.3E\text{-}5$ ; Supplementary Table 2), as opposed to a nonsignificant  
192 correlation between the number of nodes and individual identification accuracy ( $r = 0.52$ ,  
193  $p\text{-value} = 0.15$ ). This implies that the ability of *a priori* defined functional networks to  
194 capture similarities in the FC profiles of monozygotic twins differentially relies on the  
195 amount of information provided (i.e., by the number of nodes).

196 Finally, we performed all the previous analyses for the identification of dizygotic twins.  
197 At this time, we selected only the dizygotic individuals ( $n=134$ ) within the 'target' set,  
198 giving  $134 \times 380 = 50,920$  comparisons. For the whole-brain based identification, the mean  
199 prediction accuracy was  $8.9\%$  ( $SD = 2.3\%$ ;  $p\text{-value} < 0.001$ ). This abrupt change in twin  
200 identification accuracy indicates that the functional connectivity patterns of monozygotic  
201 twins are strictly more similar in comparison to dizygotic twins, which indicates the  
202 relevance of shared genetic background. At the level of individual functional networks,  
203 identification accuracies dropped even further (Figure 1B), and they were also correlated  
204 with the number of nodes of the networks ( $r = 0.92$ ,  $p\text{-value} < 0.001$ ).

205 *Fingerprinting as a function of the number of edges*

206 The previous results indicated that twin identification accuracy was correlated with the  
207 number of nodes of functional networks, and hence with the number of edges. To further  
208 investigate the relationship between the number of edges in connectome fingerprinting  
209 and twin identification accuracy, we performed identification analyses using randomly  
210 selected subsets of edges, with 100 random selections per subset size (Byrge & Kennedy,  
211 2018). Our results show that it is possible to identify an individual with high accuracy  
212 using a random subset of edges (Figure 2), with accuracy above 80% using only 500  
213 random edges (a similar finding is reported at Byrge & Kennedy, 2018). However,  
214 monozygotic twin identification only reaches near 50% accuracy using 10,000 random  
215 edges, while dizygotic twin identification accuracy is equal to 8% on average with the  
216 same subset size. Noteworthy, monozygotic twin identification accuracy with 500  
217 random edges was on average equal to approximately 20%, similar to the prediction  
218 accuracy using the medial frontal network (29 nodes and 406 unique edges). On the other  
219 hand, prediction accuracy reached 32% with 1,000 random edges and 46% with 5,000  
220 random edges. At a similar level, the prediction accuracy of the subcortical-cerebellum  
221 network (90 nodes and 4,005 unique edges) was 28.6%.

222 Therefore, our findings suggest that while it is possible to identify twin pairs above  
223 chance, differences seen across functional networks in twin pair identification may be  
224 mostly driven by differences in the number of nodes/edges. However, the fact that twin  
225 identification accuracy with subsets of random edges could outperform functional  
226 networks with a similar amount of edges suggests that edges might be differently  
227 influenced by genetic factors.

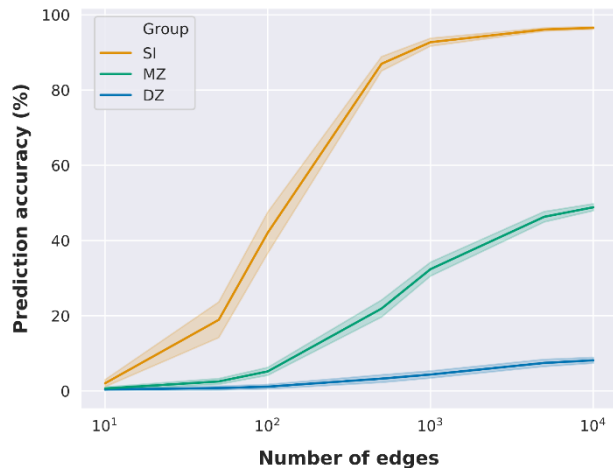

228

229 **Figure 2 - Identification accuracy as a function of the number of edges.** Identification  
230 accuracy as a function of subsets of randomly selected edges. Mean identification accuracy and  
231 standard deviation are illustrated as a function of the number of edges (we only evaluated 7  
232 different subset sizes: 10, 50, 100, 500, 1,000, 5,000, and 10,000 edges). Mean and standard  
233 deviation were determined across 100 random edge selections per subset size.

#### 234 *Intra and intersubject variability in the functional connectome*

235 In order to characterize the intra and intersubject variabilities (i.e. among unrelated  
236 individuals, monozygotic and dizygotic twin pairs) for the whole-brain connectome and  
237 each functional network, we arranged the correlation coefficients in four groups  
238 according to their relationship: 1) same individual - SI (n=380); 2) monozygotic twins -  
239 MZ (n=246); 3) dizygotic twins - DZ (n=134) and 4) unrelated individuals - UN  
240 (n=143,640). The distributions of correlations across all these pairs for the whole-brain  
241 and functional networks are illustrated in Figure 3 (Supplementary Figure 1).

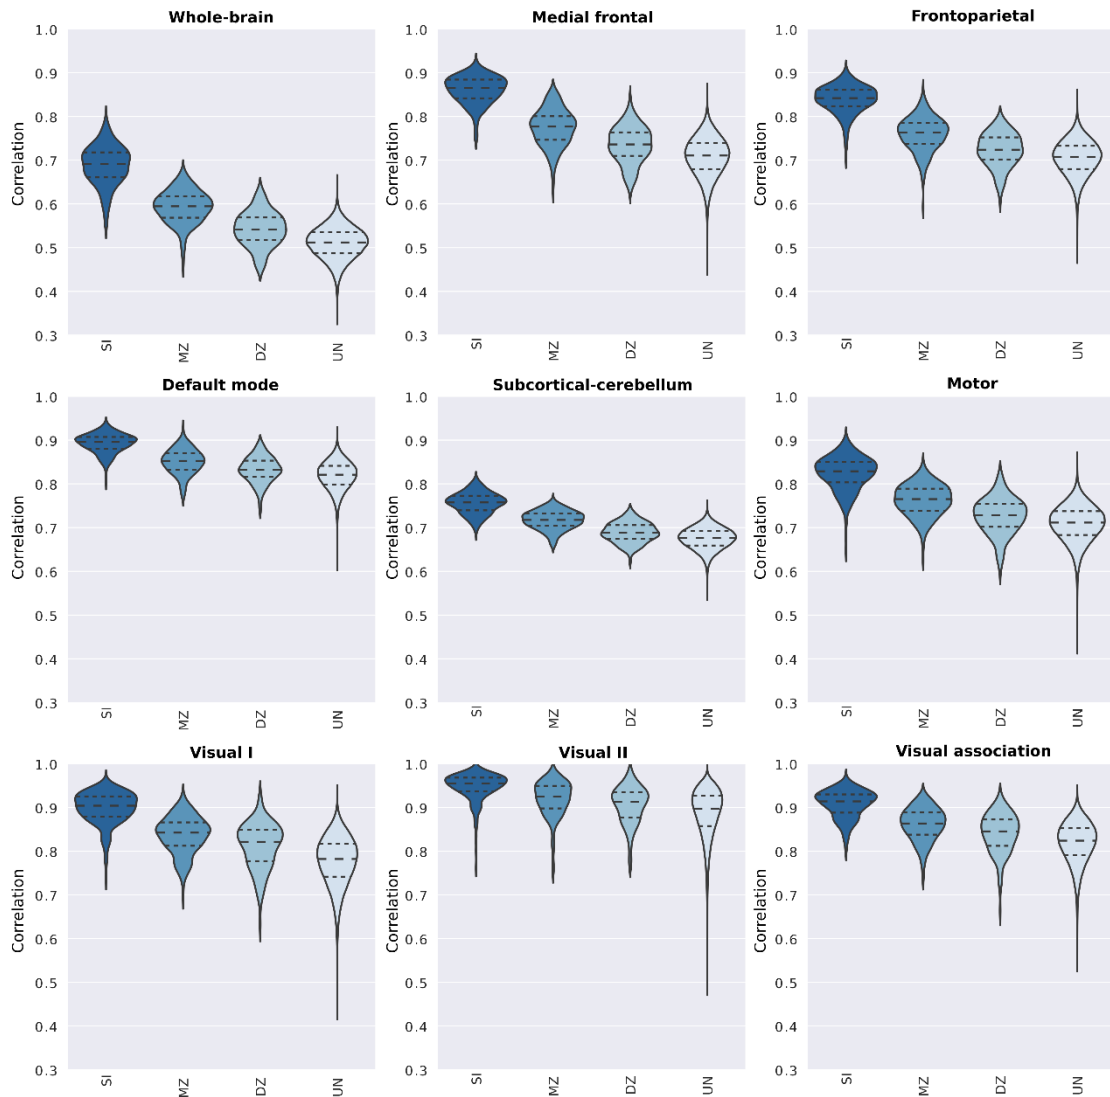

242

243 **Figure 3 - Distribution of correlation coefficients between pairs of functional connectivity**

244 **matrices for the whole-brain and individual functional networks.** Pearson's correlation scores

245 were determined from pairs of connectivity matrices ( $REST1 \times REST2$ ), and they were grouped

246 based on individuals' genetic relationship. Hence, violin plots show the distribution of the

247 correlation scores between pairs of matrices of the same individual (SI), monozygotic twin (MZ),

248 dizygotic twin (DZ) and unrelated individuals (UN).

249 As one could expect, the mean of the distributions of correlation scores from the SI group

250 is notably higher than the ones from the remaining groups. This is observed not only for

251 the whole-brain connectome but also for most of the functional networks, especially for

252 the medial frontal and frontoparietal functional networks. In order to characterize the

253 importance of the distance between these distributions - that is, the effect size - to  
254 identification analyses, we determined identification accuracy as a function of effect size,  
255 Cliff's delta (Cliff, 1993) (Figure 4, Supplementary Figure 2 and Supplementary Table  
256 3). In Figure 4, we observe that high prediction accuracy is associated with high effect  
257 size, while low prediction accuracy was associated with low effect size. This suggests  
258 that high intersubject variability (which is related to low correlation between unrelated  
259 individuals' connectivity matrices) and low intrasubject variability (high correlation  
260 between the connectivity matrices of the same individual in different sessions) are crucial  
261 for high prediction accuracy. Additionally, the higher similarity between monozygotic  
262 twins in comparison to unrelated individuals (medium to high effect sizes) suggests that  
263 a portion of this intersubject variability is heritable and differs across functional networks.

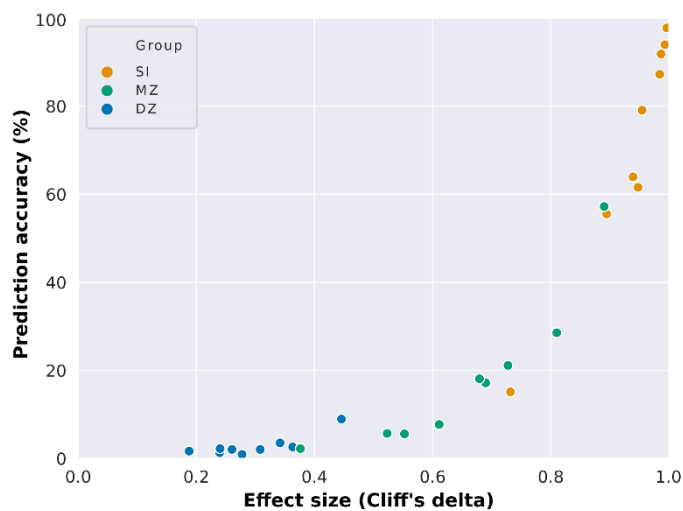

264  
265 **Figure 4 - Dependence of connectome-based predictions on effect size.** Mean prediction  
266 accuracies from all functional networks (whole-brain included) as a function of the effect size of  
267 the difference between the group of interest (same individual – SI, monozygotic twins – MZ, or  
268 dizygotic twins – DZ) and unrelated individuals.

### 269 *Narrow-sense heritability of functional connections*

270 To further investigate these functional networks, we performed heritability analyses using  
271 a multivariate ACE modeling approach with bootstrapping. High dimensionality is a

272 common hurdle when multivariate processing is considered for regression or inference  
273 methods. Hence, univariate analyses are usually preferred to avoid the necessity of  
274 increasing computational resources and time due to high dimensional multivariate  
275 analyses trade-off, despite the fact that multivariate analyses tend to be more suitable for  
276 complex data that includes several thousand of covariates. In neuroscience, the  
277 heritability of functional networks is usually determined as the average heritability of  
278 individual functional connections (edges) over their constituent brain regions (nodes)  
279 (Colclough et al., 2017; Elliott et al., 2019; Ge et al., 2017). Here, we propose a lower-  
280 dimensional multivariate ACE modeling approach with bootstrapping that allows one to  
281 generate a distribution of means for each variance component (Figure 5).

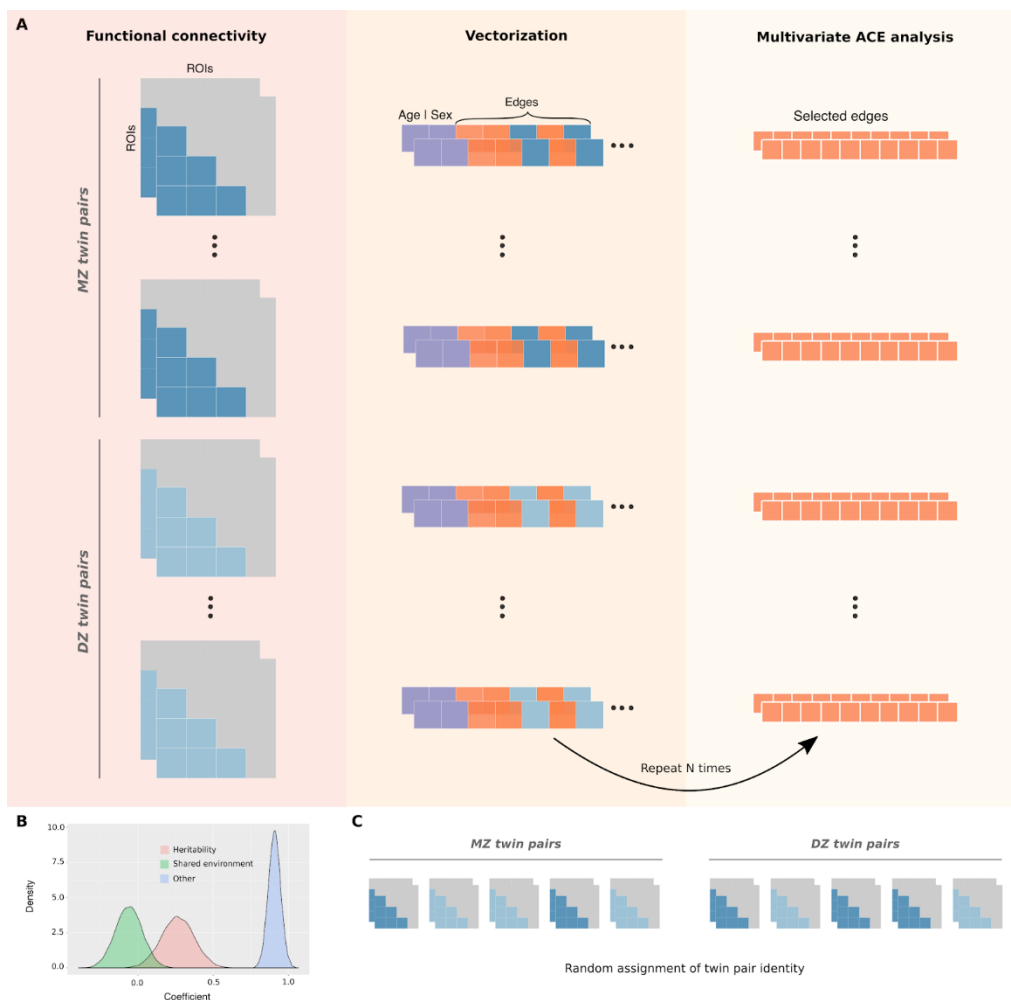

282

283 **Figure 5 – Multivariate ACE model with bootstrapping.** **A)** The lower triangles of mean  
284 functional connectivity matrices were vectorized, and the effect of age and sex were regressed out  
285 from each edge. In an iterative process, 10 edges were randomly selected and used as variables to  
286 fit a multivariate ACE model. This procedure was repeated with reposition for 8,000 times for the  
287 whole-brain network (or 1,000 times for each functional network). **B)** This approach provides  
288 distributions of means for each variance component (A, C and E) by taking the average of the  
289 heritability estimates across edges at each iteration. **C)** Null distributions were similarly obtained  
290 by randomly shuffling monozygotic and dizygotic twin statuses at each iteration.

291 This multivariate approach involved the random selection of 10 edges (within the  
292 functional network of interest) that were used as variables to fit a multivariate ACE model  
293 (Figure 5A). The multivariate ACE model decomposes the variance of each edge into  
294 additive genetic influences (A, or narrow-sense heritability (Mayhew & Meyre, 2017)),  
295 shared environment (C) and external sources of variability (E). Then, we determined the  
296 mean of A, C and E components across edges. This procedure was repeated with  
297 reposition for 8,000 times for the whole-brain network and 1,000 times for each functional  
298 network, which resulted in the final distributions of means for each component (A, C and  
299 E) (Figure 5B). Finally, null distributions were similarly obtained by randomly shuffling  
300 monozygotic and dizygotic twin statuses at each iteration (Figure 5C).

301 The heritability distributions with their respective null distributions for all functional  
302 networks are illustrated in Figure 6A (Supplementary Figure 3). As expected, the mean  
303 heritability of all null distributions was virtually equal to zero. Apart from that, all  
304 heritability estimates distributions were significantly different from their respective null  
305 distributions (independent t-test,  $p < .001$ ). Among all functional networks, the visual II  
306 has shown to be the most heritable with mean heritability of 0.37 (37% of the variance of  
307 the phenotype is attributed to additive shared genetics; Supplementary Table 4), while the

308 subcortical-cerebellum was the least heritable with mean heritability of 0.20 (Figure 6B  
 309 and Supplementary Table 4, 5 and 6). Additionally, we compared the mean heritability  
 310 found for all functional networks using our approach with the mean estimates based on  
 311 univariate models (Figure 6C). As expected, the mean heritability found using our  
 312 approach is nearly equal to the classic univariate heritability (Supplementary Table 7),  
 313 which is based on averaging estimates across all functional connections within each  
 314 functional network. Finally, heritability estimates were not significantly correlated with  
 315 number of nodes ( $r = -0.34$ ,  $p$ -value = 0.38) nor monozygotic twin identification accuracy  
 316 ( $r = -0.33$ ,  $p$ -value = 0.39).

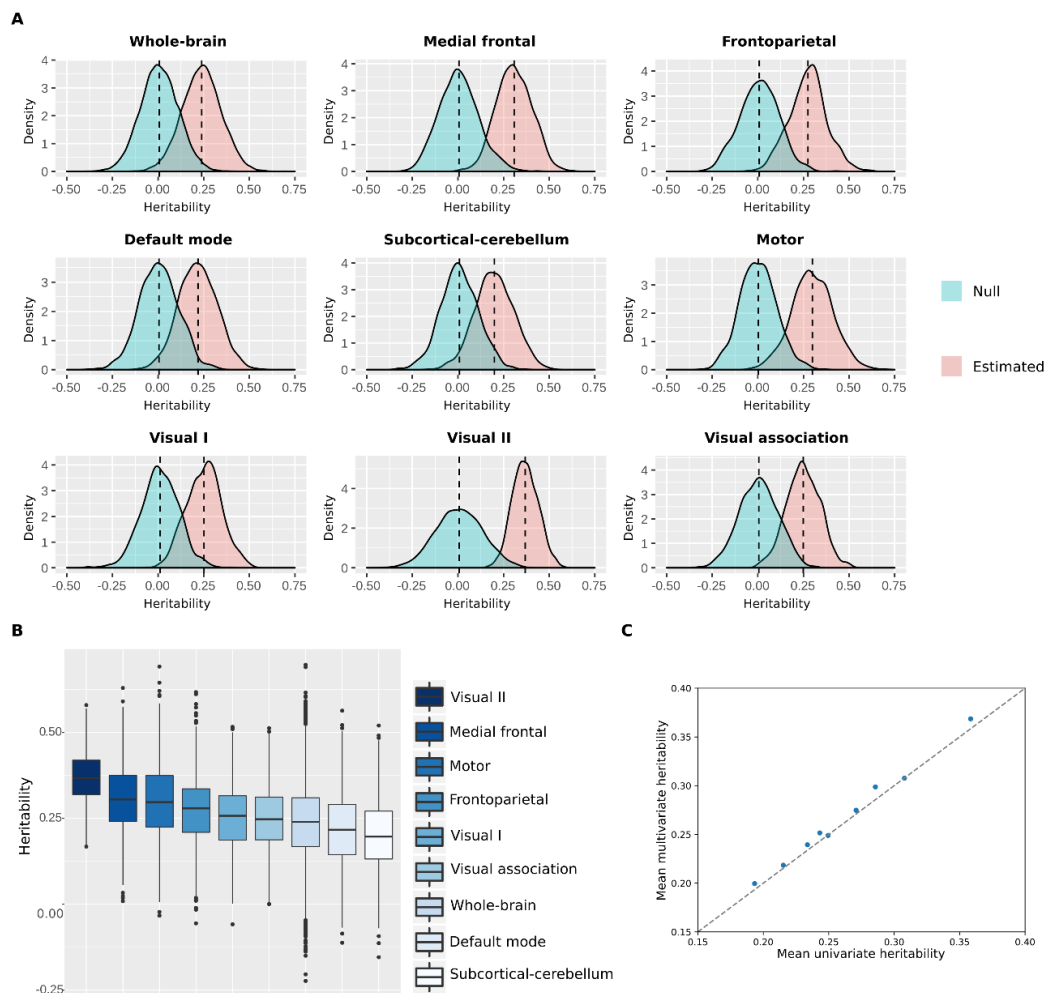

317

318 **Figure 6 – Heritability distributions for each functional network. A)** Heritability estimates  
 319 and null distributions for each functional network. **B)** Heritability estimates distributions



320 displayed from the most heritable (visual II) to the least heritable (subcortical-cerebellum). C)  
321 Comparison of the mean heritability found with multivariate ACE models *versus* univariate ACE  
322 models for all functional networks.

## 323 **Discussion**

324 Here, we found that the functional connectivity profiles of twin pairs were more similar  
325 than of unrelated individuals, although the degree of similarity varied across functional  
326 networks. Indeed, we demonstrated that functional networks have distinct discriminatory  
327 power in connectome fingerprinting analyses, in both individual and twin identifications,  
328 although in the latter differences in identification performances may be mostly driven by  
329 differences in the number of nodes/edges. We also found that high intersubject variability  
330 (i.e. variability of a trait between individuals) is crucial for connectome fingerprinting.  
331 Finally, our multivariate ACE modeling approach suggests that the heritability of  
332 functional networks are consistent throughout the brain, although our findings suggest  
333 that functional networks are differentially influenced by additive genetic factors.  
334 Altogether, we were able to establish the influence of genetic factors to intersubject  
335 variability of functional networks by leveraging a multivariate ACE model in addition to  
336 the multivariate connectome fingerprinting approach.

### 337 ***Intra and intersubject variability trade-off in connectome fingerprinting***

338 Evidence suggests that the different levels of inter and intrasubject variability in  
339 functional networks contribute to their distinctiveness, such that high intersubject  
340 (Gratton et al., 2018; Mueller et al., 2013) and low intrasubject (Laumann et al., 2015;  
341 Poldrack et al., 2015) variability in higher-order associative networks are often related to  
342 their high discriminability (Finn et al., 2015; Jalbrzikowski et al., 2020; Kaufmann et al.,  
343 2017; Miranda-Dominguez et al., 2018, 2014; Mueller et al., 2013) and the opposite

344 pattern to the low discriminability of primary sensory and motor networks (Gratton et al.,  
345 2018; Laumann et al., 2015; Mueller et al., 2013; Poldrack et al., 2015). We confirmed  
346 that higher-order associative networks were the most discriminatory, while visual  
347 networks were the least discriminatory, although they showed similar levels of  
348 intrasubject variability. This finding was similarly seen in twin pair identifications,  
349 although in the latter the prediction accuracy was positively correlated with the number  
350 of nodes defining each functional network. To further investigate the inter and  
351 intrasubject variability trade-off in connectome fingerprinting, we determined the  
352 prediction accuracy as a function of the difference between the similarity scores of  
353 functional networks derived from the same individual - in different resting-state sessions  
354 - and unrelated individuals. We found that high identification accuracy requires high  
355 intersubject variability, suggesting that although the stability of idiosyncratic functional  
356 connectivity patterns is relevant and seen across all functional networks, fingerprinting  
357 seems to rely prominently on high intersubject variability.

### 358 ***Genetic influence on functional networks***

359 To investigate the impact of additive genetic factors in determining stable patterns of  
360 intersubject variability, we performed an alternative approach to the univariate ACE  
361 model. In our multivariate ACE model, a fixed number of edges were randomly and  
362 iteratively selected to fit the model, and the mean heritability estimate was determined by  
363 averaging individual edges heritability at each of those iterations. Therefore, 8,000  
364 models were fitted to estimate the heritability of the whole-brain network, as opposed to  
365 fitting 35,778 univariate models. In addition to that, 1,000 models were generated for  
366 each functional network, totaling 16,000 models (8,000 models for the whole-brain  
367 network + 8 \* 1,000 models), which is still far less than fitting 35,778 univariate models.  
368 We also observed a gain in statistical power with our approach (this is illustrated by the

369 narrower confidence intervals of the multivariate model – Supplementary Table 4 – as  
370 opposed to the univariate version – Supplementary Table 7). Additionally, our modeling  
371 approach provides a straightforward way for building null distributions by randomly  
372 shuffling twin statuses at each iteration as the final step before heritability estimation.  
373 Therefore, we believe that the contribution of this method is twofold: it reduces the  
374 number of models to be fitted for the estimation of the heritability of functional networks  
375 and it also provides a straightforward way for building null distributions.

376 We found that the functional networks that were the most influenced by additive genetic  
377 factors were not the ones that best performed on twin identifications. This is particularly  
378 prominent for the visual II and subcortical-cerebellum functional networks. The first has  
379 shown to be highly influenced by additive genetic factors, but it had a poor performance  
380 on monozygotic twin identification and individual identification. This indicates that the  
381 intersubject variability was low, thus being difficult to discriminate between pairs of  
382 connectomes from UN/Twin/SI groups. However, a great portion of this low intersubject  
383 variability might be due to additive genetic factors. On the other hand, the subcortical-  
384 cerebellum network has shown lower heritability but the best performance on twin  
385 identification (after whole-brain network). A possible explanation for this finding is that  
386 a high intersubject variability allowed a better discrimination between unrelated  
387 individuals *versus* twin pairs, even though a smaller portion of its intersubject variability  
388 was due to additive genetic factors. Nonetheless, our findings also suggest that twin  
389 identification accuracy of functional networks varies with the number of edges, indicating  
390 that the inconsistency seen between twin identification accuracy and heritability is  
391 perhaps an artefact associated with the confounding effect of number of edges on twin  
392 identification.

393 Finally, heritable patterns of functional connectivity strength of individual edges may  
394 emerge from underlying brain anatomy. Anatomical features of the brain have been  
395 shown to be highly heritable (Panizzon et al., 2009; Roshchupkin et al., 2016; Strike et  
396 al., 2015; Thompson et al., 2001). This suggests that the similarity of brain anatomy in  
397 twins might lead to better alignment of their brain structure to a template space as opposed  
398 to unrelated individuals. Therefore, when functional units of the brain are determined by  
399 a group-based parcellation, variability in functional connectivity strength partly reflects  
400 how well a template parcel matches the actual functional unit of a given individual. For  
401 example, a given region A in a group-based parcellation could not only overlap with  
402 distinct regions across unrelated individuals, but also consistently overlap with a similar  
403 area in twins (Anderson et al., 2020). This could lead to the greater similarity of individual  
404 edges between twins and higher inter-subject variability across unrelated individuals just  
405 because regions being selected are ultimately different. We believe that assessing  
406 heritability of functional connectivity patterns using individualized parcellations (Glasser  
407 et al., 2016; Kong et al., 2019) might shed some light into this issue.

#### 408 ***Parcellation schema***

409 The individual and twin identification analyses resulted in high prediction accuracy using  
410 both parcellation schemas, "Shen" and "Gordon". Notably, individual identification  
411 accuracies using "Shen" parcellation schema is about the same as in previous studies  
412 (Finn et al., 2015; Waller et al., 2017), even though we have a more homogenous sample.  
413 At the network-level, higher-order associative networks were particularly better at  
414 discriminations. This result further supports that associative networks accommodate  
415 higher intersubject variability in comparison to sensorimotor networks (Gratton et al.,  
416 2018). Despite that, we observed that the default mode network (DMN) defined by both  
417 parcellation schemas differed in performance during identification analyses. For

418 “Gordon” parcels, the DMN figured among the most distinctive networks, similarly to  
419 other associative networks. However, this pattern was not observed using “Shen” parcels,  
420 in which the defined DMN figured among the worst functional networks on individual  
421 predictions. This distinction could be due to the different number of nodes attributed to  
422 DMN in both schemas. Another finding is that the heritability level of functional networks  
423 differed between parcellations, although the mean heritability of the whole-brain  
424 functional network was 0.18 using “Gordon” parcels and 0.24 using “Shen” parcels  
425 (Supplementary Table 4). This suggests that different brain areas definition greatly  
426 impact on heritability estimates, which is a potential topic for further investigation.

427 Using “Gordon” parcellation, we found that the cingulo parietal and retrosplenial  
428 temporal networks were the most influenced by additive genetic factors, whilst the  
429 somato-sensory mouth and salience networks were the least ones. On the other hand,  
430 Miranda-Dominguez et al. (2018) found that the retrosplenial temporal and somato-  
431 sensory mouth were the most heritable, and the visual and salience networks the least  
432 heritable. Additionally, their heritability estimates ranged from 0.11 to 0.14, with the  
433 heritability of the whole-brain network being equal to 0.20 (Miranda-Dominguez et al.,  
434 2018); while our estimates ranged from 0.47 to 0.12. These differences are likely due to  
435 differences in heritability estimation approaches; whilst we used the conventional ACE  
436 modeling approach, they used three-way repeated-measures ANOVAs. Although the  
437 heritability estimates we obtained using “Shen” parcels were more homogeneous, we  
438 were still able to capture the different levels of heritability of functional networks,  
439 suggesting that our approach is suitable for capturing such differences. Additionally,  
440 using a similar methodology, Colclough et al. (2017) found that the heritability of the  
441 connectivity strength averaged over parcels was 0.17 for the whole-brain network, and  
442 Elliot et al. (2019) found a value of about 0.20. This suggests that, although heritability

443 estimates of functional networks vary depending on the parcellation being used, the  
444 whole-brain functional network heritability seems to be reasonably consistent across  
445 studies using different methodologies and parcellations.

#### 446 *Limitations*

447 The effect of head motion on rsfMRI functional connectivity has been assessed over the  
448 last decade, and evidence suggests that head motion parameters systematically affect  
449 functional connectivity estimates. Van Dijk, Sabuncu, & Buckner (2012) found that  
450 increasing mean motion was significantly associated with decreased functional  
451 correlation strength among regions in the DMN and the frontoparietal control network,  
452 even after regressing out six parameters from the rigid body head motion correction at the  
453 preprocessing stage. On the other hand, high levels of head motion were associated with  
454 increased local functional connectivity. Finally, their findings suggested that aspects of  
455 head motion may behave as trait, which was further investigated by Couvy-Duchesne and  
456 colleagues. In Couvy-Duchesne et al. (2014), the influence of additive genetics and  
457 environment factors on three head motion parameters have been estimated, and their  
458 findings suggest that head motion is partially heritable. These findings effectively suggest  
459 that head motion not only systematically affects functional connectivity but it is also  
460 partially heritable, indicating that head motion may bias heritability estimates of  
461 functional connectivity strength.

462 The effect of additional preprocessing steps on the confounding effect of head motion in  
463 functional connectivity has been systematically investigated (Siegel et al., 2017).  
464 Researchers found that extra preprocessing steps to the HCP minimally preprocessed  
465 dataset have substantially reduced the correlation of head motion with functional  
466 connectivity. Here, we have similarly added extra preprocessing steps to the HCP  
467 minimally preprocessed dataset, including CompCor, temporal band-pass filtering, and

468 participants' movement parameters were used as first-level covariates to regress out their  
469 linear components from the BOLD time series. However, it is important to note that  
470 complete removal of the spurious effect of motion through regression is difficult (if not  
471 impossible). Thus, we believe that the field would benefit from more studies that  
472 systematically assess the effect of removing motion parameters at different stages on  
473 heritability estimates of functional connectivity.

#### 474 *Future directions*

475 Our multivariate ACE model suggests that part of the intersubject variability seen in  
476 functional networks is due to genetic factors. Transcriptomics and genomics approaches  
477 have indicated that many brain disorders are, at least partly, determined by the genetic  
478 background (Gandal et al., 2018; Kasten et al., 2018; Prata, Costa-Neves, Cosme, &  
479 Vassos, 2019; Sims, Hill, & Williams, 2020). Additionally, disruptions in the human  
480 functional and structural connectomes have been associated with neurological conditions,  
481 such as amyotrophic lateral sclerosis (ALS) (Chenji et al., 2016), Parkinson's disease  
482 (Gratton et al., 2019; Hall et al., 2019), and epilepsy (Lee et al., 2018). Specifically,  
483 neurotoxic accumulation of amyloid plaques in Alzheimer's disease has been located in  
484 areas consistent with cortical hubs, indicating that while cortical hubs are fundamental  
485 for information processing, they also bring vulnerability to the human brain (Buckner et  
486 al., 2009). Also, many compelling studies have linked psychiatric disorders to  
487 fundamental connectome disruptions (van den Heuvel & Sporns, 2019). Despite their  
488 unique functional and structural connectivity patterns, these conditions also exhibit some  
489 shared patterns that differ from healthy connectomes. The common features of many of  
490 these disorders make it difficult to diagnose them and to determine the mechanisms  
491 behind their onset, particularly for psychiatric disorders. Thus, detailed scrutiny of the  
492 human connectome and genome may lead to a promising new era for precision medicine

493 in psychiatry and neurology. Connectome fingerprinting in addition to heritability  
494 analyses may allow for the search of connectome features that bring general and specific  
495 vulnerabilities to the human brain, which may be highly heritable, and are central factors  
496 among brain disorders (van den Heuvel & Sporns, 2019).

497 Finally, it is important to acknowledge that although we found differences in heritability  
498 estimates across functional networks, such estimates of heritability could be susceptible  
499 to different models of heritability. For example, heritability could be better explained with  
500 an AE model, in which variance is decomposed into additive genetic factors (A) and  
501 external sources of variability (E) only. Additionally, the low reliability of individual  
502 edges' connectivity strength (Noble, Scheinost, & Constable, 2019; Noble et al., 2017)  
503 and higher reliability of the connectome as whole suggests that common (shared among  
504 edges) and specific (non-shared) sources of genetic variance may differ. The multivariate  
505 ACE model used here has been used before to estimate the genetic correlation between  
506 two traits, cortical surface area and cortical thickness (Panizzon et al., 2009). However,  
507 we believe that a common pathway model would be the most suitable model to study  
508 common sources of genetic variance of many edges (Couvy-Duchesne et al., 2014).  
509 Therefore, although we found differences in how additive genetic factors may be  
510 influencing intersubject variability of functional networks, such estimates are not definite.  
511 Critically, different models' assumptions may potentially lead to inconsistent findings of  
512 heritability estimates for large-scale functional networks, and future refinements of such  
513 estimates (using meta-analysis, for instance) should consider them.



514 **Materials and Methods**

515 *Database and participant information*

516 In this study, we used the dataset from the "1200 subjects data release" of the Human  
517 Connectome Project – HCP (Van Essen et al., 2013). We restricted our analysis to  
518 monozygotic (MZ) and dizygotic (DZ) individuals as indicated by genotyping  
519 information. So, we initially selected all MZ and DZ individuals from the original sample.  
520 From this subsample, we excluded the participants who did not have both resting-state  
521 fMRI sessions (ICA-FIX versions) available, and who did not have the twin within the  
522 group. Therefore, our final sample size was n=380. Table 1 summarizes the demographic  
523 data.

524

525 **Table 1 - Demographic information.**

|                 | Monozygotic<br>(n=246) | Dizygotic<br>(n=134) |
|-----------------|------------------------|----------------------|
| <hr/>           |                        |                      |
| Age, y          |                        |                      |
| Mean ± SD       | 29.4 ± 3.3             | 29.1 ± 3.5           |
| Range (min-max) | 22 – 36                | 22 – 35              |
| <hr/>           |                        |                      |
| Sex, n (%)      |                        |                      |
| Female          | 144 (58.5)             | 78 (58.2)            |
| Male            | 102 (41.5)             | 56 (41.8)            |
| <hr/>           |                        |                      |

526

527 ***Data acquisition***

528 The acquisition protocol has been previously described (Van Essen et al., 2013). In  
529 summary, functional and structural data were acquired in a 3T Siemens Skyra scanner  
530 using a 32-channel head coil. Resting-state data were collected in two separated sessions  
531 (REST1 and REST2) in different days, each session containing two runs of 15 minutes.  
532 In this protocol, participants had to keep their eyes open with a relaxed fixation on a  
533 projected bright cross-hair in a dark background. Each run within a session is  
534 distinguished by the oblique axial acquisition, of which one run used phase encoding in  
535 a right-to-left (RL) direction and the other used phase encoding in a left-to-right (LR)  
536 direction.

537 ***Data pre-processing***

538 **Pre-processing pipeline**

539 For this study, we used the spatial and temporal pre-processed rs-fMRI timecourses  
540 (Glasser et al., 2013; Smith et al., 2013), which have undergone the steps of artifact  
541 removal, motion correction, and registration to standard space. Furthermore, we applied  
542 additional pre-processing steps by using the CONN toolbox (v.17.f) (Whitfield-Gabrieli  
543 & Nieto-Castanon, 2012), which included: structural segmentation, functional outlier  
544 detection (intermediate setting: 5 for z-score scan-to-scan global signal changes and 0.9  
545 mm for scan-to-scan head-motion composite changes), and functional smoothing.  
546 Following that, a component-based noise correction method (CompCor) (Behzadi,  
547 Restom, Liao, & Liu, 2007) and a temporal band-pass filtering (preserving frequencies  
548 between 0.01 and 0.10Hz) were applied. For spatial smoothing, a Gaussian with the full  
549 width at half maximum (FWHM) equal to 6mm was used. We also included participant

550 movement parameters as first-level covariates to regress out their linear components from  
551 the BOLD time series.

#### 552 **Parcellations and functional networks**

553 Timecourses were calculated as the mean signal within the regions of interest (ROIs)  
554 defined by different parcellation schemas used: “Gordon” (Gordon et al., 2014) and  
555 “Shen” (Shen et al., 2013). Both “Gordon” and “Shen” schemas are data-driven  
556 parcellation schemas. The first defines 333 ROIs clustered in 12 functional networks  
557 (Supplementary Table 1), in addition to 47 ROIs not assigned to any specific network.  
558 The latter defines 268 ROIs clustered in 8 networks (Supplementary Table 1).

#### 559 **Functional connectivity matrices**

560 Finally, for the two resting-state sessions, data from both the left-right (LR) and right-left  
561 (RL) phase-encoding runs were used to calculate the connectivity matrices. To obtain the  
562 connectivity matrices, ROI-to-ROI bivariate correlation connectivity measures were  
563 computed for all ROIs defined by both parcellation methods, obtaining two symmetric  
564 connectivity matrices for each session for each participant.

#### 565 ***Individual identification***

566 The identification analysis was based on previous work (Finn et al., 2015) with few  
567 alterations. Initially, two databases were created containing the functional connectivity  
568 matrices for each session (REST1 and REST2). The individual identification was  
569 determined by computing the Pearson’s correlation of each individual connectivity matrix  
570 from one database with all the other connectivity matrices from the second database  
571 (RESTX × RESTY, where X and Y ∈ {1, 2} and X≠Y). For a pair of functional  
572 connectivity matrices linearly transformed in a column vector (vectorization),  $T_i$  and  $D_n$ ,  
573 where  $T_i$  is the connectivity matrix of a target participant  $i$ , and  $D_n$  is the connectivity

574 matrix of a participant ( $n=1, \dots, 380$ ) from the other database, the Pearson's correlation  
575 coefficient  $r$  is:

$$576 \quad r_{i,N} = \frac{\sum_{j=1}^e (T_{ij} - \underline{T}_i)(D_{Nj} - \underline{D}_N)}{\sqrt{\sum_{j=1}^e (T_{ij} - \underline{T}_i)^2} \sqrt{\sum_{j=1}^e (D_{Nj} - \underline{D}_N)^2}} \quad \text{Equation 1}$$

577 where  $e$  is the number of edges. In order to predict the identity of the target participant,  
578 the maximal Pearson's correlation coefficient was selected (Figure 1A). Additionally, we  
579 also investigated the contribution of single networks to identification accuracy by sub-  
580 sectioning the functional connectivity matrices into sub-matrices of single networks. To  
581 perform this, we selected only connection within a specified network. Then, we calculated  
582 the Pearson's correlation coefficients, similarly to the previous approach. Results are  
583 reported as mean  $\pm$  SD.

#### 584 ***Twin identification***

585 The twin pair identification algorithm was based on the previous individual identification  
586 analysis. At this stage, we removed the correlations corresponding to the same individual  
587 in different sessions, that is the diagonal of individuals  $\times$  individuals matrices, and then  
588 performed a new set of identification analyses. In this condition, if the chosen maximum  
589 correlation value belonged to the target subject's twin, the prediction was considered  
590 correct. Monozygotic and dizygotic twins were analyzed separately, and all conditions  
591 (RESTX  $\times$  RESTY, where X and Y  $\in$  {1, 2}) were tested. Results are reported as mean  
592  $\pm$  SD.

#### 593 ***Statistical significance assessment***

594 To assess the statistical significance of twin identification analyses, we performed a  
595 permutation testing. To ensure the independence of the dataset, we permuted the twin  
596 pairs' identities, such that for each row of the 'individuals vs. individuals' matrix (Figure

597 1A) a new twin pair identity was assigned. The permutation process was repeated 1,000  
598 times for each functional network.

### 599 *Effect size*

600 The distribution of correlation scores between pairs of connectivity matrices (i.e.  
601 correlation among the vectorized form of the connectivity matrices) was determined by  
602 grouping these scores based on familial relationship: 1) same individual - SI; 2)  
603 monozygotic twins - MZ; 3) dizygotic twins - DZ and 4) unrelated individuals - UN.  
604 Following that, the effect size of the differences between the distributions of correlation  
605 values was measured through the calculation of Cliff's delta. This a non-parametric effect  
606 size measure based on all pairwise differences (Cliff, 1993), which gives how often values  
607 from one distribution are larger than the ones from a second distribution (Equation 2).

608

$$609 \quad \text{Delta } (d) = \frac{\text{Sum}(x_1 > x_2) - \text{Sum}(x_1 < x_2)}{n_1 n_2} \quad \text{Equation 2}$$

610

611 Therefore, the number of times that values from one group are higher than the ones from  
612 a second group is calculated for all possible combinations of values between the two  
613 groups ( $n_1 n_2$ , where  $n_1$  and  $n_2$  are the number of values within the distribution 1 and 2,  
614 respectively). The final Cliff's delta value is the difference between the previous  
615 calculations divided by all possible combinations. Thus, a positive and high value of  $d$   
616 ( $d_{\text{maximum}} = 1$ ) mean that values within distribution 1 are mostly higher than the ones within  
617 distribution 2, a negative and high absolute value of  $d$  ( $d_{\text{minimum}} = -1$ ) means the other way  
618 round, that values within distribution 1 are mostly lower than the ones within distribution  
619 2, and  $d = 0$  means that the distribution 1 and 2 are equal.

620 ***Heritability analyses***

621 Functional connectivity measures from two different days (REST1 and REST2) were  
622 averaged, giving a functional connectivity matrix per participant. As mentioned before,  
623 whole-brain functional connectivity matrices were determined by using two distinct  
624 parcellation schemas: "Shen" (Shen et al., 2013) (268 nodes, 71,824 edges) and "Gordon"  
625 (Gordon et al., 2014) (333 nodes, 110,889 edges). The first step involved the vectorization  
626 of functional connectivity matrices' lower triangle ("Shen" - 35,778 edges; "Gordon" -  
627 55,278 edges). The heritability analyses were performed using the umx package (Bates,  
628 Maes, & Neale, 2019), after regressing out the effect of age and sex using  
629 'umx\_residualize'.

630 Heritability of functional networks was estimated using a multivariate ACE model,  
631 'umxACEv' from umx package (Bates et al., 2019), with bootstrapping. Specifically,  
632 'umxACEv' model allocates observed phenotypic variability of each variable and  
633 between variables (variance/covariance matrix) into three latent factors: A (additive  
634 genetic factors -  $h^2$ ), C (shared environment -  $c^2$ ) and E (measurement error or external  
635 sources of variability -  $e^2$ ) (Neale & Cardon, 1992; Panizzon et al., 2009). This model  
636 outputs a variance/covariance load matrix for each component (A, C and E). In each  
637 component matrix, the diagonal represents the proportion of variance that that factor  
638 explains of each variable's phenotypic variability, while off-diagonal terms give the  
639 proportion of the covariance between variables. Here, we only focused on the partitioning  
640 of variance for the estimation of network heritability, doing so by averaging the estimates  
641 in the diagonal of each model fit.

642 In each iteration of model fitting, a subset of 10 edges was randomly selected and used to  
643 fit the previously described ACE model. This procedure was repeated with reposition for  
644 8,000 times (or 12,000 times when "Gordon" parcels was used) for whole-brain, and

645 1,000 times for each functional network. The number of iterations was determined such  
646 that every edge would be selected at least twice (i.e. 8,000 iterations \* 10 edges = 80,000).  
647 This approach provides distributions of means of each component (A, C and E) for each  
648 functional network. Finally, null distributions were similarly obtained by randomly  
649 shuffling monozygotic and dizygotic twin statuses at each iteration (Colclough et al.,  
650 2017). Independent t-student tests were performed separately to evaluate whether each  
651 functional network's heritability distribution significantly differed from their respective  
652 null distribution.

### 653 *Code availability*

654 All source codes will be available at  
655 [https://github.com/felenitaribeiro/fingerprinting\\_twinStudy](https://github.com/felenitaribeiro/fingerprinting_twinStudy) and  
656 <https://github.com/frcsantos/heritability> upon publication of this manuscript.

### 657 *Citation diversity statement*

658 Recent work in neuroscience and other fields identified a bias in citation practices such  
659 that papers from women and other minorities are under-cited relative to the number of  
660 such papers in the field (Caplar, Tacchella, & Birrer, 2017; Dion, Sumner, & Mitchell,  
661 2018; Dworkin et al., 2020; Maliniak, Powers, & Walter, 2013; Mitchell, Lange, & Brus,  
662 2013). Here we sought to proactively consider choosing references that reflect the  
663 diversity of the field in thought, form of contribution, gender, and other factors. Gender  
664 of the first and last author of each reference was predicted by using databases that store  
665 the probability of a name being carried by a man or a woman (Dworkin et al., 2020). By  
666 this measure (and excluding self-citations to the first and last authors of our current  
667 paper), our references contain 10.31% woman(first)/woman(last), 18.36% man/woman,

668 21.55% woman/man, and 49.78% man/man. We look forward to future work that could  
669 help us to better understand how to support equitable practices in science.

## 670 **Acknowledgments**

671 This work was supported by the Universidade Federal do ABC (UFABC) and  
672 Coordination of Improvement of Higher Education Personnel (CAPES). Data were  
673 provided by the Human Connectome Project, WU-Minn Consortium (Principal  
674 Investigators: David Van Essen and Kamil Ugurbil; 1U54MH091657) funded by the 16  
675 NIH Institutes and Centers that support the NIH Blueprint for Neuroscience Research;  
676 and by the McDonnell Center for Systems Neuroscience at Washington University.

## 677 **Author contributions**

678 F.L.R., F.R.C.S and C.E.B. conceptualized the study. F.L.R. and F.R.C.S. designed and  
679 performed the analyses with support from W.H.L.P. F.L.R. wrote the original draft. All  
680 authors revised and edited the manuscript. J.R.S., W.H.L.P., and C.E.B provided support  
681 and guidance with data interpretation.

## 682 **Competing Interests**

683 The authors declare no competing interests.

## 684 **References**

685 Adhikari, B. M., Jahanshad, N., Shukla, D., Glahn, D. C., Blangero, J., Fox, P. T., ...  
686 Kochunov, P. (2018). Comparison of heritability estimates on resting state fMRI  
687 connectivity phenotypes using the ENIGMA analysis pipeline. *Human Brain*



- 688        *Mapping*, (June), 1–10. <https://doi.org/10.1002/hbm.24331>
- 689    Anderson, K. M., Ge, T., Kong, R., Patrick, L. M., Spreng, R. N., Sabuncu, M. R., ...  
690        Holmes, A. J. (2020). Heritability of individualized cortical network topography.  
691        *BioRxiv*, 1–28.
- 692    Arslan, S., Ktena, S. I., Makropoulos, A., Robinson, E. C., Rueckert, D., & Parisot, S.  
693        (2018). Human brain mapping: A systematic comparison of parcellation methods for  
694        the human cerebral cortex. *NeuroImage*, 170(April 2017), 5–30.  
695        <https://doi.org/10.1016/j.neuroimage.2017.04.014>
- 696    Bates, T. C., Maes, H., & Neale, M. C. (2019). Umx: Twin and path-based structural  
697        equation modeling in R. *Twin Research and Human Genetics*, 22(1), 27–41.  
698        <https://doi.org/10.1017/thg.2019.2>
- 699    Behzadi, Y., Restom, K., Liau, J., & Liu, T. T. (2007). A component based noise  
700        correction method (CompCor) for BOLD and perfusion based fMRI. *NeuroImage*,  
701        37(1), 90–101. <https://doi.org/10.1016/j.neuroimage.2007.04.042>
- 702    Buckner, R. L., Sepulcre, J., Talukdar, T., Krienen, F. M., Liu, H., Hedden, T., ...  
703        Johnson, K. A. (2009). Cortical hubs revealed by intrinsic functional connectivity:  
704        Mapping, assessment of stability, and relation to Alzheimer’s disease. *Journal of*  
705        *Neuroscience*, 29(6), 1860–1873. [https://doi.org/10.1523/JNEUROSCI.5062-](https://doi.org/10.1523/JNEUROSCI.5062-08.2009)  
706        08.2009
- 707    Byrge, L., & Kennedy, D. P. (2018). High-accuracy individual identification using a “thin  
708        slice” of the functional connectome. *Network Neuroscience*, 1–48.  
709        [https://doi.org/10.1162/netn\\_a\\_00068](https://doi.org/10.1162/netn_a_00068)
- 710    Caplar, N., Tacchella, S., & Birrer, S. (2017). Quantitative evaluation of gender bias in

- 711 astronomical publications from citation counts. *Nature Astronomy*, *1*(May).  
712 <https://doi.org/10.1038/s41550-017-0141>
- 713 Chenji, S., Jha, S., Lee, D., Brown, M., Seres, P., Mah, D., & Kalra, S. (2016).  
714 Investigating default mode and sensorimotor network connectivity in amyotrophic  
715 lateral sclerosis. *PLoS ONE*, *11*(6), 1–14.  
716 <https://doi.org/10.1371/journal.pone.0157443>
- 717 Cliff, N. (1993). Dominance statistics: Ordinal analyses to answer ordinal questions.  
718 *Psychological Bulletin*, *114*(3), 494–509. [https://doi.org/10.1037/0033-](https://doi.org/10.1037/0033-2909.114.3.494)  
719 [2909.114.3.494](https://doi.org/10.1037/0033-2909.114.3.494)
- 720 Colclough, G. L., Smith, S. M., Nichols, T. E., Winkler, A. M., Sotiropoulos, S. N.,  
721 Glasser, M. F., ... Woolrich, M. W. (2017). The heritability of multi-modal  
722 connectivity in human brain activity. *ELife*, *6*, 1–19.  
723 <https://doi.org/10.7554/eLife.20178>
- 724 Couvy-Duchesne, B., Blokland, G. A. M., Hickie, I. B., Thompson, P. M., Martin, N. G.,  
725 de Zubicaray, G. I., ... Wright, M. J. (2014). Heritability of head motion during  
726 resting state functional MRI in 462 healthy twins. *NeuroImage*, *102*(2), 424–434.  
727 <https://doi.org/10.1016/j.neuroimage.2014.08.010>
- 728 Demeter, D. V., Engelhardt, L. E., Mallett, R., Gordon, E. M., Nugiel, T., Harden, K. P.,  
729 ... Church, J. A. (2020). Functional Connectivity Fingerprints at Rest Are Similar  
730 across Youths and Adults and Vary with Genetic Similarity. *IScience*, *23*(1),  
731 100801. <https://doi.org/10.1016/j.isci.2019.100801>
- 732 Dion, M. L., Sumner, J. L., & Mitchell, S. M. (2018). Gendered Citation Patterns across  
733 Political Science and Social Science Methodology Fields. *Political Analysis*, *26*(3),  
734 312–327. <https://doi.org/10.1017/pan.2018.12>

- 735 Dubois, J., & Adolphs, R. (2016). Building a science of individual differences from fMRI.  
736 *Trends in Cognitive Sciences*, 20(6), 425–443.  
737 <https://doi.org/10.1016/j.tics.2016.03.014>
- 738 Dworkin, J. D., Linn, K. A., Teich, E. G., Zurn, P., Shinohara, R. T., & Bassett, D. S.  
739 (2020). The extent and drivers of gender imbalance in neuroscience reference lists.  
740 *Nature Neuroscience*, 23(8), 918–926. <https://doi.org/10.1038/s41593-020-0658-y>
- 741 Eickhoff, S. B., Yeo, B. T. T., & Genon, S. (2018). Imaging-based parcellations of the  
742 human brain. *Nature Reviews Neuroscience*, 19(11), 672–686.  
743 <https://doi.org/10.1038/s41583-018-0071-7>
- 744 Elliott, M. L., Knodt, A. R., Cooke, M., Kim, M. J., Melzer, T. R., Keenan, R., ... Hariri,  
745 A. R. (2019). General functional connectivity: Shared features of resting-state and  
746 task fMRI drive reliable and heritable individual differences in functional brain  
747 networks. *NeuroImage*, 189(January), 516–532.  
748 <https://doi.org/10.1016/j.neuroimage.2019.01.068>
- 749 Finn, E. S., Shen, X., Scheinost, D., Rosenberg, M. D., Huang, J., Chun, M. M., ...  
750 Constable, R. T. (2015). Functional connectome fingerprinting: identifying  
751 individuals using patterns of brain connectivity. *Nature Neuroscience*, 18(11), 1664–  
752 1671. <https://doi.org/10.1038/nn.4135>
- 753 Gandal, M. J., Haney, J. R., Parikshak, N. N., Leppa, V., Ramaswami, G., Hartl, C., ...  
754 Geschwind, D. H. (2018). Shared molecular neuropathology across major  
755 psychiatric disorders parallels polygenic overlap. *Science*, 359(6376), 693–697.  
756 <https://doi.org/10.1126/science.aad6469>
- 757 Ge, T., Holmes, A. J., Buckner, R. L., Smoller, J. W., & Sabuncu, M. R. (2017).  
758 Heritability analysis with repeat measurements and its application to resting-state

- 759 functional connectivity. *Proceedings of the National Academy of Sciences*, 114(21),  
760 5521–5526. <https://doi.org/10.1073/pnas.1700765114>
- 761 Glasser, M. F., Coalson, T. S., Robinson, E. C., Hacker, C. D., Harwell, J., & Yacoub, E.  
762 (2016). A multi-modal parcellation of human cerebral cortex. *Nature*, 536(7615),  
763 171–178. <https://doi.org/10.1038/nature18933>
- 764 Glasser, M. F., Sotiropoulos, S. N., Wilson, J. A., Coalson, T. S., Fischl, B., Andersson,  
765 J. L., ... Jenkinson, M. (2013). The minimal preprocessing pipelines for the Human  
766 Connectome Project. *NeuroImage*, 80, 105–124.  
767 <https://doi.org/10.1016/j.neuroimage.2013.04.127>
- 768 Gordon, E. M., Laumann, T. O., Adeyemo, B., Huckins, J. F., Kelley, W. M., & Petersen,  
769 S. E. (2014). Generation and Evaluation of a Cortical Area Parcellation from  
770 Resting-State Correlations. *Cerebral Cortex*, 26(1), 288–303.  
771 <https://doi.org/10.1093/cercor/bhu239>
- 772 Gratton, C., Koller, J. M., Shannon, W., Greene, D. J., Maiti, B., Snyder, A. Z., ...  
773 Campbell, M. C. (2019). Emergent Functional Network Effects in Parkinson  
774 Disease. *Cerebral Cortex*, 29(6), 2509–2523. <https://doi.org/10.1093/cercor/bhy121>
- 775 Gratton, C., Laumann, T. O., Nielsen, A. N., Greene, D. J., Gordon, E. M., Gilmore, A.  
776 W., ... Petersen, S. E. (2018). Functional Brain Networks Are Dominated by Stable  
777 Group and Individual Factors, Not Cognitive or Daily Variation. *Neuron*, 439–452.  
778 <https://doi.org/10.1016/j.neuron.2018.03.035>
- 779 Hall, J. M., O’Callaghan, C., Muller, A. J., Martens, K. A. E., Phillips, J. E., Moustafa,  
780 A. A., ... Shine, J. M. (2019). Changes in structural network topology correlate with  
781 severity of hallucinatory behavior in Parkinson’s disease. *Network Neuroscience*,  
782 3(2), 521–538. <https://doi.org/10.1162/NETN>

- 783 Jalbrzikowski, M., Liu, F., Foran, W., Klei, L., Calabro, F. J., Roeder, K., ... Luna, B.  
784 (2020). Functional connectome fingerprinting accuracy in youths and adults is  
785 similar when examined on the same day and 1.5-years apart. *Human Brain Mapping*,  
786 (April), 1–13. <https://doi.org/10.1002/hbm.25118>
- 787 Kasten, M., Hartmann, C., Hampf, J., Schaake, S., Westenberger, A., Vollstedt, E. J., ...  
788 Klein, C. (2018). Genotype-Phenotype Relations for the Parkinson's Disease Genes  
789 Parkin, PINK1, DJ1: MDSGene Systematic Review. *Movement Disorders*, 33(5),  
790 730–741. <https://doi.org/10.1002/mds.27352>
- 791 Kaufmann, T., Alnæs, D., Doan, N. T., Brandt, C. L., Andreassen, O. A., & Westlye, L.  
792 T. (2017). Delayed stabilization and individualization in connectome development  
793 are related to psychiatric disorders. *Nature Neuroscience*, 20(4), 513–515.  
794 <https://doi.org/10.1038/nn.4511>
- 795 Kong, R., Li, J., Orban, C., Sabuncu, M. R., Liu, H., Schaefer, A., ... Yeo, B. T. T. (2019).  
796 Spatial Topography of Individual-Specific Cortical Networks Predicts Human  
797 Cognition, Personality, and Emotion. *Cerebral Cortex*, 29(6), 2533–2551.  
798 <https://doi.org/10.1093/cercor/bhy123>
- 799 Laumann, T. O., Gordon, E. M., Adeyemo, B., Snyder, A. Z., Joo, S. J., Chen, M. Y., ...  
800 Petersen, S. E. (2015). Functional System and Areal Organization of a Highly  
801 Sampled Individual Human Brain. *Neuron*, 87(3), 658–671.  
802 <https://doi.org/10.1016/j.neuron.2015.06.037>
- 803 Lee, K., Khoo, H. M., Lina, J. M., Dubeau, F., Gotman, J., & Grova, C. (2018).  
804 Disruption, emergence and lateralization of brain network hubs in mesial temporal  
805 lobe epilepsy. *NeuroImage: Clinical*, 20(December 2017), 71–84.  
806 <https://doi.org/10.1016/j.nicl.2018.06.029>

- 807 Maliniak, D., Powers, R., & Walter, B. F. (2013). The gender citation gap in international  
808 relations. In *International Organization* (Vol. 67).  
809 <https://doi.org/10.1017/S0020818313000209>
- 810 Mayhew, A. J., & Meyre, D. (2017). Assessing the Heritability of Complex Traits in  
811 Humans: Methodological Challenges and Opportunities. *Current Genomics*, 18(4),  
812 332–340. <https://doi.org/10.2174/1389202918666170307161450>
- 813 Miranda-Dominguez, O., Feczko, E., Grayson, D. S., Walum, H., Nigg, J. T., & Fair, D.  
814 A. (2018). Heritability of the human connectome: a connectotyping study. *Network  
815 Neuroscience*, 2(2), 175–199. <https://doi.org/10.1162/netn>
- 816 Miranda-Dominguez, O., Mills, B. D., Carpenter, S. D., Grant, K. A., Kroenke, C. D.,  
817 Nigg, J. T., & Fair, D. A. (2014). Connectotyping: Model based fingerprinting of the  
818 functional connectome. *PLoS ONE*, 9(11).  
819 <https://doi.org/10.1371/journal.pone.0111048>
- 820 Mitchell, S. M., Lange, S., & Brus, H. (2013). Gendered Citation Patterns in International  
821 Relations Journals. *International Studies Perspectives*, 14(4), 485–492.  
822 <https://doi.org/10.1111/insp.12026>
- 823 Mueller, S., Wang, D., Fox, M. D., Yeo, B. T. T., Sepulcre, J., Sabuncu, M. R., ... Liu,  
824 H. (2013). Individual Variability in Functional Connectivity Architecture of the  
825 Human Brain. *Neuron*, 77(3), 586–595.  
826 <https://doi.org/10.1016/j.neuron.2012.12.028>
- 827 Neale, M. C., & Cardon, L. R. (1992). *Methodology for genetic studies of twins and  
828 families*. Dordrecht, The Netherlands: Kluwer Academic Publishers.
- 829 Noble, S., Scheinost, D., & Constable, R. T. (2019). A decade of test-retest reliability of

- 830 functional connectivity: A systematic review and meta-analysis. *NeuroImage*,  
831 203(December 2018), 116157. <https://doi.org/10.1016/j.neuroimage.2019.116157>
- 832 Noble, S., Spann, M. N., Tokoglu, F., Shen, X., Constable, R. T., & Scheinost, D. (2017).  
833 Influences on the Test-Retest Reliability of Functional Connectivity MRI and its  
834 Relationship with Behavioral Utility. *Cerebral Cortex*, 27(11), 5415–5429.  
835 <https://doi.org/10.1093/cercor/bhx230>
- 836 Panizzon, M. S., Fennema-Notestine, C., Eyler, L. T., Jernigan, T. L., Prom-Wormley,  
837 E., Neale, M., ... Kremen, W. S. (2009). Distinct genetic influences on cortical  
838 surface area and cortical thickness. *Cerebral Cortex*, 19(11), 2728–2735.  
839 <https://doi.org/10.1093/cercor/bhp026>
- 840 Poldrack, R. A., Laumann, T. O., Koyejo, O., Gregory, B., Hover, A., Chen, M. Y., ...  
841 Mumford, J. A. (2015). Long-term neural and physiological phenotyping of a single  
842 human. *Nature Communications*, 6. <https://doi.org/10.1038/ncomms9885>
- 843 Prata, D. P., Costa-Neves, B., Cosme, G., & Vassos, E. (2019). Unravelling the genetic  
844 basis of schizophrenia and bipolar disorder with GWAS: A systematic review.  
845 *Journal of Psychiatric Research*, 114(October 2018), 178–207.  
846 <https://doi.org/10.1016/j.jpsychires.2019.04.007>
- 847 Roshchupkin, G. V., Gutman, B. A., Vernooij, M. W., Jahanshad, N., Martin, N. G.,  
848 Hofman, A., ... Adams, H. H. H. (2016). Heritability of the shape of subcortical  
849 brain structures in the general population. *Nature Communications*, 7, 1–8.  
850 <https://doi.org/10.1038/ncomms13738>
- 851 Salehi, M., Greene, A. S., Karbasi, A., Shen, X., Scheinost, D., & Constable, R. T. (2020).  
852 There is no single functional atlas even for a single individual: Functional parcel  
853 definitions change with task. *NeuroImage*, 208(November 2019), 116366.

- 854 <https://doi.org/10.1016/j.neuroimage.2019.116366>
- 855 Sato, J. R., White, T. P., & Biazoli, C. E. (2017). Commentary: A test-retest dataset for  
856 assessing long-term reliability of brain morphology and resting-state brain activity.  
857 *Frontiers in Neuroscience, 11*(FEB), 1–4. <https://doi.org/10.3389/fnins.2017.00085>
- 858 Seghier, M. L., & Price, C. J. (2018). Interpreting and Utilising Intersubject Variability  
859 in Brain Function. *Trends in Cognitive Sciences, 22*(6), 517–530.  
860 <https://doi.org/10.1016/j.tics.2018.03.003>
- 861 Shen, X., Tokoglu, F., Papademetris, X., & Constable, R. T. (2013). Groupwise whole-  
862 brain parcellation from resting-state fMRI data for network node identification.  
863 *NeuroImage, 82*, 403–415. <https://doi.org/10.1016/j.neuroimage.2013.05.081>
- 864 Siegel, J. S., Mitra, A., Laumann, T. O., Seitzman, B. A., Raichle, M., Corbetta, M., &  
865 Snyder, A. Z. (2017). Data quality influences observed links between functional  
866 connectivity and behavior. *Cerebral Cortex, 27*(9), 4492–4502.  
867 <https://doi.org/10.1093/cercor/bhw253>
- 868 Sims, R., Hill, M., & Williams, J. (2020). The multiplex model of the genetics of  
869 Alzheimer’s disease. *Nature Neuroscience, 23*(3), 311–322.  
870 <https://doi.org/10.1038/s41593-020-0599-5>
- 871 Smith, S. M., Andersson, J., Auerbach, E. J., Beckmann, C. F., Bijsterbosch, J., Douaud,  
872 G., ... Consortium, W. H. C. P. (2013). Resting-state fMRI in the Human  
873 Connectome Project. *NeuroImage, 80*, 144–168.  
874 <https://doi.org/10.1016/j.neuroimage.2013.05.039>. Resting-state
- 875 Strike, L. T., Couvy-Duchesne, B., Hansell, N. K., Cuellar-Partida, G., Medland, S. E.,  
876 & Wright, M. J. (2015). Genetics and Brain Morphology. In *Neuropsychology*



- 877 *Review* (Vol. 25). <https://doi.org/10.1007/s11065-015-9281-1>
- 878 Teeuw, J., Brouwer, R. M., Guimarães, J. P. O. F. T., Brandner, P., Koenis, M. M. G.,  
879 Swagerman, S. C., ... Hulshoff Pol, H. E. (2019). Genetic and environmental  
880 influences on functional connectivity within and between canonical cortical resting-  
881 state networks throughout adolescent development in boys and girls. *NeuroImage*,  
882 202(January). <https://doi.org/10.1016/j.neuroimage.2019.116073>
- 883 Thompson, P. M., Cannon, T. D., Narr, K. L., Van Erp, T., Poutanen, V. P., Huttunen,  
884 M., ... Toga, A. W. (2001). Genetic influences on brain structure. *Nature*  
885 *Neuroscience*, 4(12), 1253–1258. <https://doi.org/10.1038/nn758>
- 886 van den Heuvel, M. P., & Sporns, O. (2019). A cross-disorder connectome landscape of  
887 brain dysconnectivity. *Nature Reviews Neuroscience*, 20(7), 435–446.  
888 <https://doi.org/10.1038/s41583-019-0177-6>
- 889 van Dijk, K. R. A., Sabuncu, M. R., & Buckner, R. L. (2012). The Influence of Head  
890 Motion on Intrinsic Functional Connectivity MRI. *NeuroImage*, 59(1), 431–438.  
891 <https://doi.org/doi:10.1016/j.neuroimage.2011.07.044>
- 892 Van Essen, D. C., Smith, S. M., Barch, D. M., Behrens, T. E. J., Yacoub, E., & Ugurbil,  
893 K. (2013). The WU-Minn Human Connectome Project: An overview. *NeuroImage*,  
894 80, 62–79. <https://doi.org/10.1016/j.neuroimage.2013.05.041>
- 895 Waller, L., Walter, H., Kruschwitz, J. D., Reuter, L., Müller, S., Erk, S., & Veer, I. M.  
896 (2017). Evaluating the replicability, specificity, and generalizability of connectome  
897 fingerprints. *NeuroImage*, 158(May), 371–377.  
898 <https://doi.org/10.1016/j.neuroimage.2017.07.016>
- 899 Whitfield-Gabrieli, S., & Nieto-Castanon, A. (2012). *Conn* : A Functional Connectivity

900           Toolbox for Correlated and Anticorrelated Brain Networks. *Brain Connectivity*,  
901           2(3), 125–141. <https://doi.org/10.1089/brain.2012.0073>

902    Yang, Z., Zuo, X.-N., McMahon, K. L., Craddock, R. C., Kelly, C., de Zubicaray, G. I.,  
903           ... Wright, M. J. (2016). Genetic and Environmental Contributions to Functional  
904           Connectivity Architecture of the Human Brain. *Cerebral Cortex*, 26(5), 2341–2352.  
905           <https://doi.org/10.1093/cercor/bhw027>

906
